# Supplementary material for: Accelerated selective oxidation of benzyl alcohol to benzaldehyde via a self-catalyzed Pickering emulsion microreactor
Source: Royal Society of Chemistry journal article supplement (doi:10.1039/d4ta04195j), 2024-01-01
Supplement: d4ta04195j1.pdf [file d4ta04195j1.pdf]

## Supporting Information

### Accelerated selective oxidation of benzyl alcohol to benzaldehyde via a self-catalyzed Pickering emulsion microreactor

Hongbing Dan <sup>a,b</sup>, Han Zhao <sup>a</sup>, Yue Gao <sup>a,\*</sup>, Baiyu Zhang <sup>b</sup>, Xing Xu <sup>a</sup>, Qinyan Yue <sup>a</sup>,  
Tiina Leiviskä <sup>c</sup>, Bo Jin <sup>d</sup>, Bing Chen <sup>b</sup> and Baoyu Gao <sup>a</sup>

*a. Shandong Provincial Key Laboratory of Water Pollution Control and Resource Reuse,  
School of Environmental Science and Engineering, Shandong University, Jinan 250100, PR  
China*

*b. Northern Region Persistent Organic Pollution Control (NRPOP) Laboratory, Faculty of  
Engineering and Applied Science, Memorial University of Newfoundland, St. John's, NL, A1B  
3X5, Canada*

*c. Chemical Process Engineering, University of Oulu, PO Box 4300, FIN-90014, Oulu, Finland*

*d. School of Chemical Engineering, The University of Adelaide, 5005 Adelaide, Australia*

\*Corresponding author:

E-mail: [ygao@sdu.edu.cn](mailto:ygao@sdu.edu.cn) (Y. Gao).

This *Supporting Information* includes

21 Pages

5 Texts

16 Figures

3 Tables

### 34 **Text S1. Materials**

35 The pristine *Enteromorpha*, collected from the coast in Qingdao, China (36.15 N,  
36 120.58 E), was first rinsed with tap water, dried at 50°C overnight, and then grounded  
37 to powders with a particle size of 50-200 μm. The chemicals, including n-hexane,  
38 benzyl alcohol (BzOH), benzaldehyde (BzH), potassium peroxymonosulfate (PMS),  
39 tert-butyl alcohol (TBA), ethyl alcohol (EtOH), furfuryl alcohol (FFA), p-  
40 benzoquinone (p-BQ) and dimethyl sulfoxide (DMSO), were purchased from  
41 Sinopharm Chemical Reagent Co., Ltd (Shanghai, China) and used directly without  
42 further purification.

### 43 **Text S2. Preparation of ESAB**

44 A certain amount of *Enteromorpha* powders was first put into a 10 mL corundum  
45 crucible, and then experienced a pyrolysis process in N<sub>2</sub> atmosphere at temperature of  
46 800°C for 2 h. The heating rate was designed at 5 °C min<sup>-1</sup>. Next, 2 g *Enteromorpha*-  
47 derived biochar coupled with 20 mL deionized water were sealed in an agate jar and  
48 undergone a ball-milling treatment at a rotate speed of 240 r/min for 300 min. The ball-  
49 milled samples were rinsed with deionized water and ethyl alcohol separately to remove  
50 impurities. It was then collected after vacuum drying at 50°C overnight. The ESAB  
51 obtained at different pyrolysis temperature (X) is noted as ESAB-X.

### 52 **Text S3. Characterization of Enteromorpha-prolifera-derived super-** 53 **amphiphilic biochar**

54 The surface morphologies corresponding elemental compositions of ESAB-800  
55 were identified using a field-emission scanning electron microscopy (SEM, SU8010)  
56 equipped with an energy dispersive spectroscopy (EDS) and a transmission electron  
57 microscope (JEOL 2100, TEM). High angle annular dark field scanning TEM  
58 (HAADF-STEM) images and corresponding elemental mapping were achieved by FEI  
59 Titan G2 80-200 TEM/STEM. N<sub>2</sub> adsorption/desorption measurements at -196 °C (JW-  
60 BK122W, China) were employed to determine the Brunauer-Emmett-Teller (BET)  
61 surface area and pore-size distribution of samples. X-ray diffractometer (XRD, Cu Kα,  
62 λ = 0.15406 nm, Bruker D8 Advance) at a scanning rate of 5°/min was applied to clarify

63 the crystal structures of catalysts. The surface functional groups were identified by  
64 Fourier transform infrared spectrometer (FTIR, Thermo Scientific, US) at a range of  
65 500-4000  $\text{cm}^{-1}$ . Raman spectra of samples were recorded from 250 to 4000  $\text{cm}^{-1}$  on a  
66 Raman spectrometer (Thermo Fischer DXR). The X-ray photoelectron spectroscopy  
67 (XPS) analysis was performed to investigate the surface elemental compositions and  
68 chemical states of enteromorpha-prolifera-derived super-amphiphilic biochar (ESAB).  
69 The surface wettability of various samples was clarified by a contact angle tester  
70 (HARKE-SPCAX1S). The particle size distribution of Pickering emulsion was  
71 identified by using an optical microscope (XSP-8CA).

#### 72 **Text S4. Electrochemical performance measurements**

73 All the electrochemical tests were carried out at room temperature on a CHI 760E  
74 electrochemical workstation (Shanghai Chenhua Instruments Inc., China), equipped  
75 with a standard three-electrode electrolytic cell using 0.5 M  $\text{Na}_2\text{SO}_4$  aqueous solution  
76 as electrolyte. Pt foil and saturated Ag/AgCl electrodes were set as a counter electrode  
77 and a reference electrode, respectively.

78 The working electrodes were prepared via the following procedure, based on the  
79 previously published methods <sup>1, 2</sup>. (i) Glassy carbon electrode was firstly polished  
80 repeatedly by employing  $\text{Al}_2\text{O}_3$ , and then cleaned up and dried by  $\text{N}_2$  blowing. (ii) 5.0  
81 mg of catalyst, 40  $\mu\text{L}$  of Nafion (5 wt %) and 1 mL of N,N-dimethylformamide were  
82 mixed evenly via sonication for 1 h. (iii) 3  $\mu\text{L}$  of suspensions was dropped onto the  
83 clean glassy carbon electrode and air-dried in the ambient environment.  
84 Electrochemical impedance spectra (EIS) were recorded at  $-0.3\text{ V vs. Ag/AgCl}$  within  
85 a frequency range from  $10^6$  to  $10^{-1}$  Hz using an AC voltage at a 5 mV amplitude.

#### 86 **Text S5. Galvanic oxidation system**

87 In a galvanic oxidation system, the catalyst ink (5 mg ESAB-800, 40  $\mu\text{L}$  nafion in  
88 1 mL N,N-dimethylformamide) was coated on a  $20 \times 20 \times 3$  mm graphite plate for  
89 electron channel and adsorption plate for BzOH and PMS. The loading amount of  
90 catalyst was about  $0.19\text{ mg/cm}^2$ . A copper wire was used to connect the two electrodes

91 for inter cell electron transfer. The salt bridge was prepared by adding the mixture of 3  
92 g agar and 30 g KCl in 97 ml water into U-shaped glass tube and cool down it to room  
93 temperature.

94

95

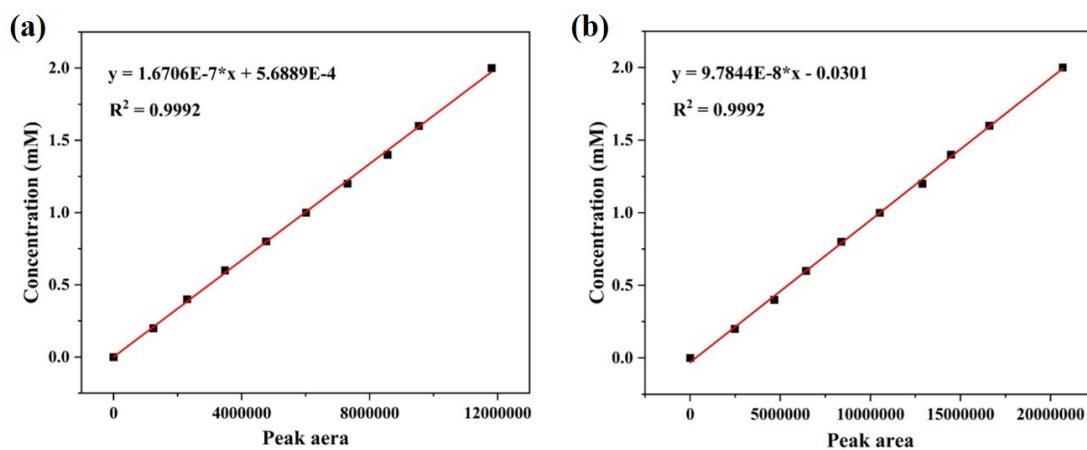

96

97

**Fig. S1.** Calibration curves of benzyl alcohol (a) and benzaldehyde (b).

98

99

100

101

102

103

104

105

106

107

108

109

110

111

112

113

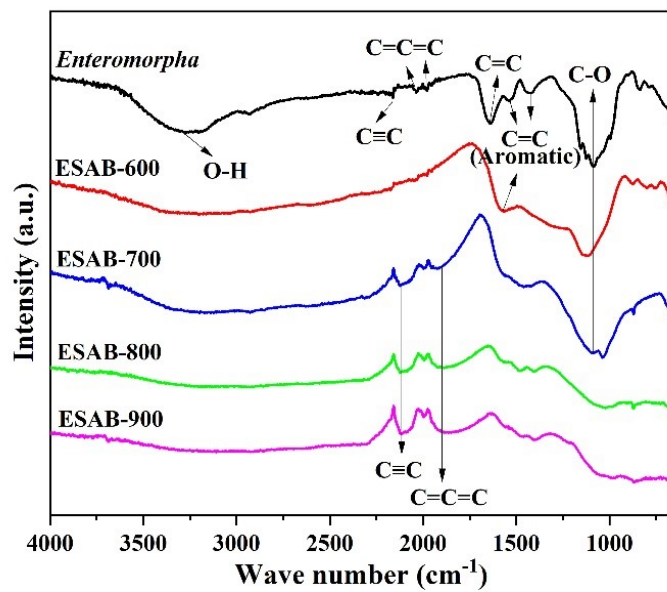

114

115 **Fig. S2.** FTIR spectra of *Enteromorpha*, ESAB-600, ESAB-700, ESAB-800 and ESAB-900.

116

117

118

119

120

121

122

123

124

125

126

127

128

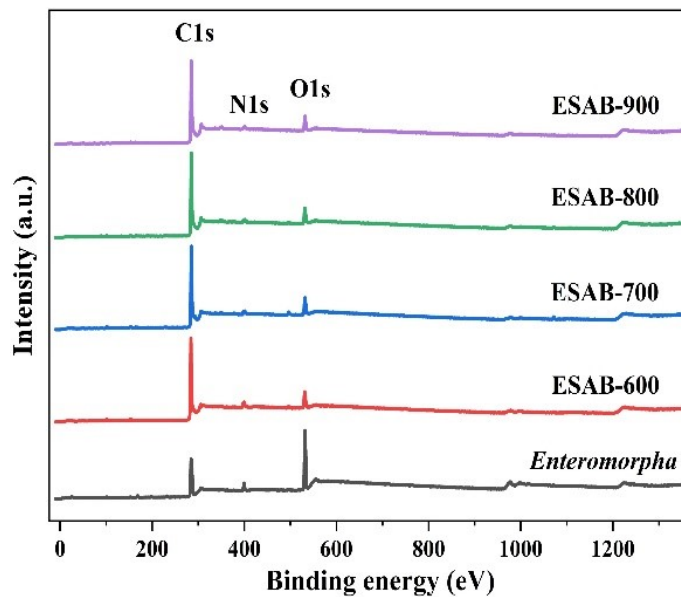

129

130 **Fig. S3.** Survey XPS spectra of *Enteromorpha*, ESAB-600, ESAB-700, ESAB-800 and ESAB-  
131 900.

132

133

134

135

136

137

138

139

140

141

142

143

144

145

146

147

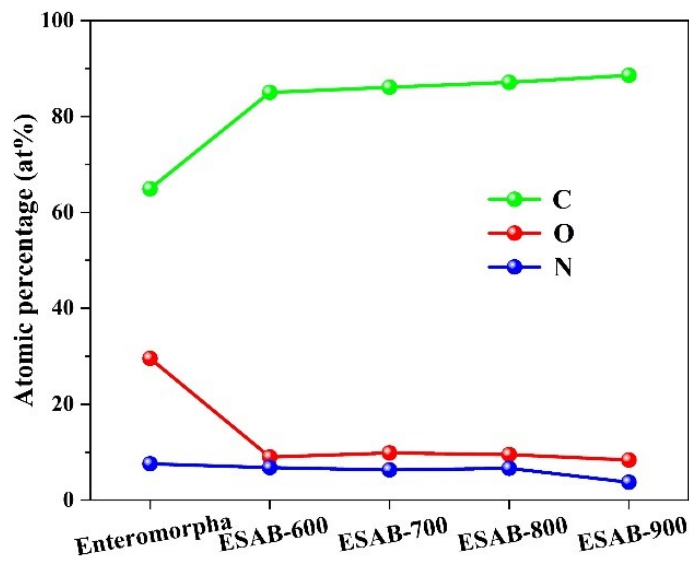

148

149 **Fig. S4.** Atomic percentage (at%) of C, N and O in *Enteromorpha*, ESAB-600, ESAB-700,  
 150 ESAB-800 and ESAB-900.

151

152

153

154

155

156

157

158

159

160

161

162

163

164

165

166

167

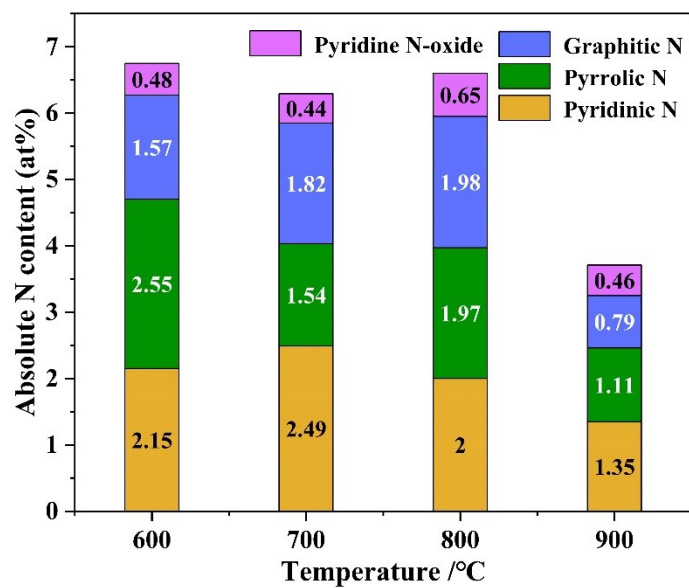

168

169 **Fig. S5.** Absolute contents of pyridinic N, pyrrolic N, graphitic N and pyridine N-oxide in each  
 170 ESAB by the deconvolution of N1s XPS spectra.

171

172

173

174

175

176

177

178

179

180

181

182

183

184

185

186

187

188

189

190

191

192

193

194

195

196



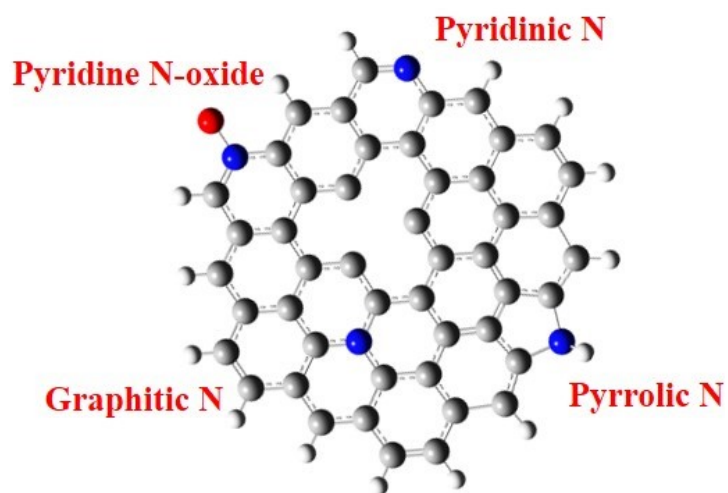

197  
198 **Fig. S6.** Schematic illustration of various nitrogen species doped in ESAB, namely, pyridinic  
199 N, pyrrolic N, graphitic N and pyridine N-oxide (i).

200

201

202

203

204

205

206

207

208

209

210

211

212

213

214

215

216

217

218

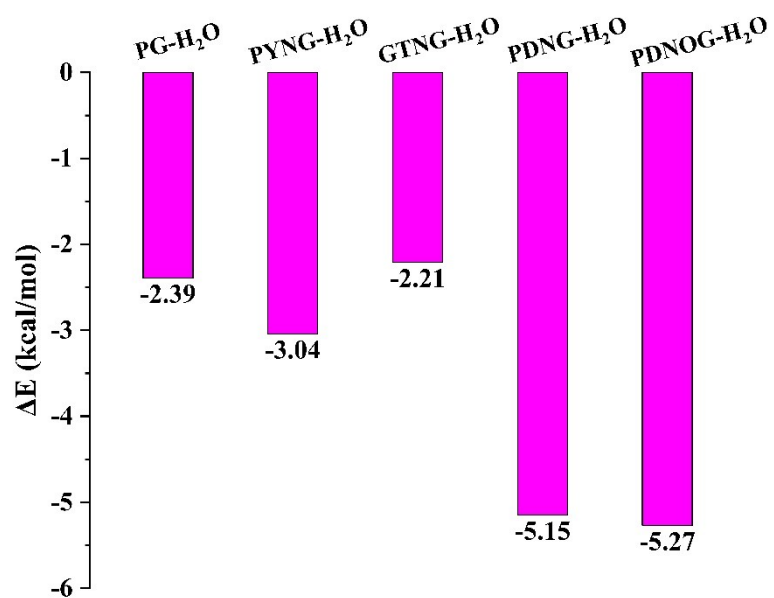

219

220 **Fig. S7.** Adsorption energies ( $\Delta E$ s) of H<sub>2</sub>O to pristine graphene (PG), pyrrolic N-doped  
221 graphene (PYNG), graphitic N-doped graphene (GTNG), pyridinic N-doped graphene  
222 (PDNG), and pyridine N-oxide-doped graphene (PDNOG).

223

224

225

226

227

228

229

230

231

232

233

234

235

236

237

238

239

240

241

242

243

244

245

246

247

248

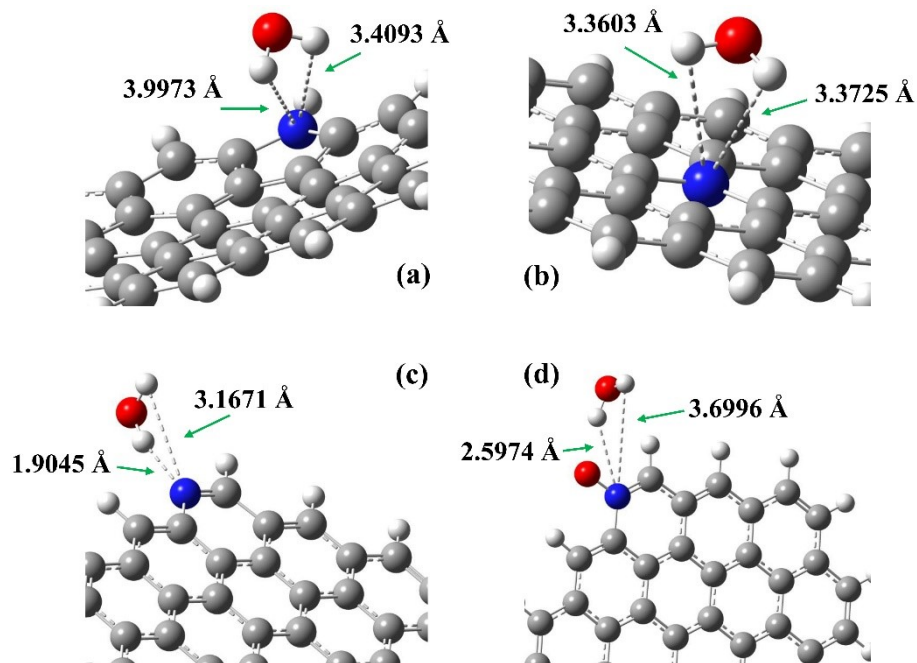

249

250 **Fig. S8.** The distance between H atom in H<sub>2</sub>O and N atom in graphene, i.e., OH ··· N. a: pyrrolic  
 251 N-doped graphene; (b) graphitic N-doped graphene; (c) pyridinic N-doped graphene; (d)  
 252 oxidized pyridinic N-doped graphene.

253

254

255

256

257

258

259

260

261

262

263

264

265

266

267

268

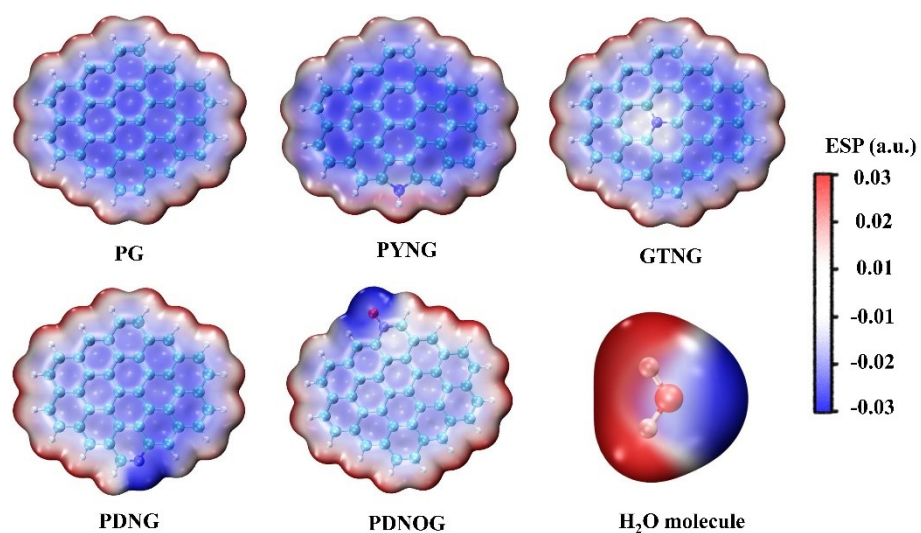

269  
 270 **Fig. S9.** Distributions of electrostatic potential (ESP) for pristine graphene (PG), pyrrolic N-  
 271 doped graphene (PYNG), graphitic N-doped graphene (GTNG), pyridinic N-doped graphene  
 272 (PDNG), oxidized pyridinic N-doped graphene (PDNOG) and H<sub>2</sub>O molecule.

273

274

275

276

277

278

279

280

281

282

283

284

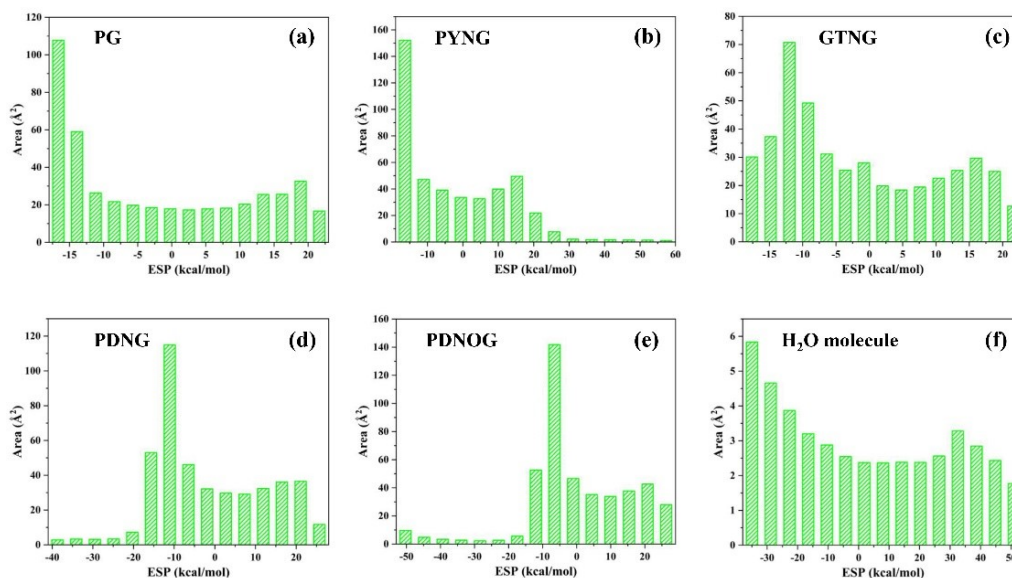

285  
 286 **Fig. S10.** Surface area in each electrostatic potential (ESP) range on the Van der Waals surface  
 287 of PG (a), PYNG (b), GTNG (c), PDNG (d), PDNOG (e) and H<sub>2</sub>O molecule.  
 288

289 **Figs. S9-10** display the electrostatic potential (ESP) distribution of PG, PYNG, GTNG,  
 290 PDNG, PDNOG and H<sub>2</sub>O molecule. It is observed that the incorporation of pyridinic  
 291 N and pyridinic N-oxide highly improved the local electronegativity of PG. As a result,  
 292 strong electrostatic attraction interaction can be formed between H atoms in H<sub>2</sub>O  
 293 molecule and pyridinic N (pyridinic N-oxide), thus promoting the water uptake to keep  
 294 super-hydrophilic.

295  
 296  
 297  
 298  
 299  
 300  
 301  
 302  
 303  
 304  
 305  
 306

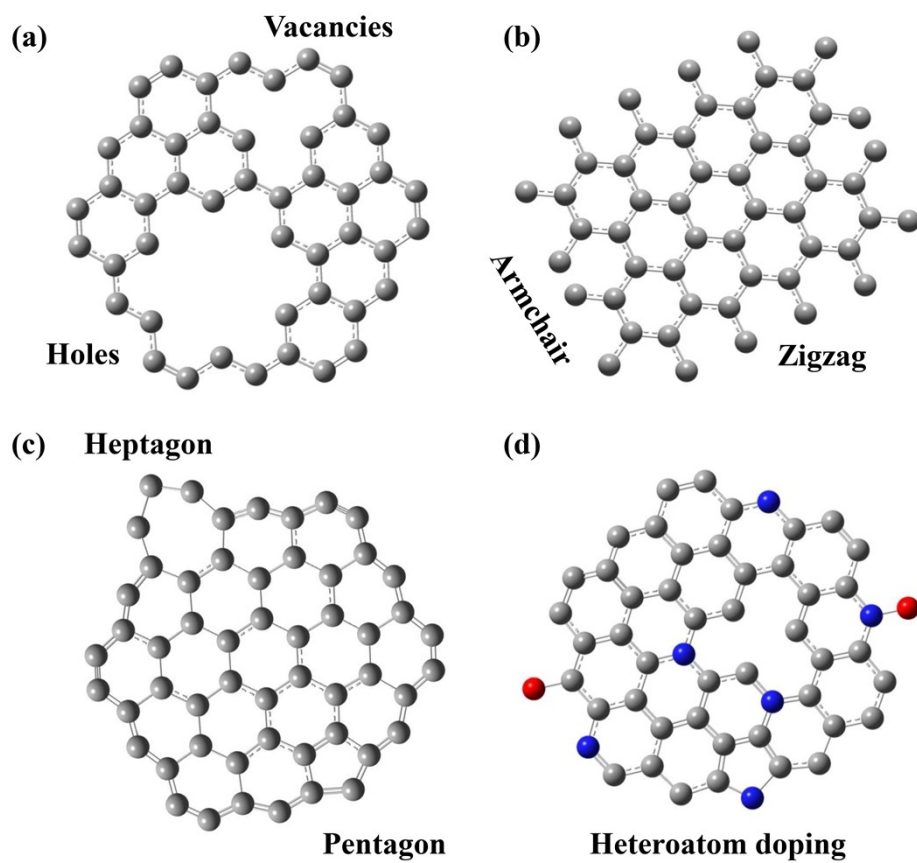

307

308 **Fig. S11.** Schematic diagrams of vacancy and hole defects (a), edge defects (b), topological  
 309 defects (c), heteroatom doping defects (d) in ESAB.

310

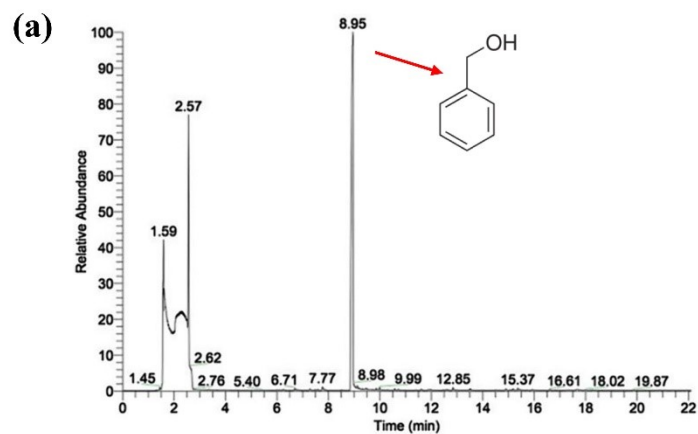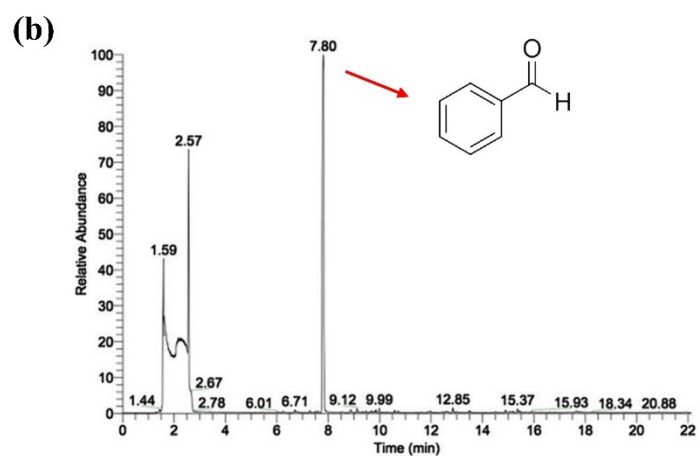

311

312 **Fig. S12.** GC-MS spectra of chromatographically pure benzyl alcohol (a) and benzaldehyde

313

(b).

314

315

316

317

318

319

320

321

322

323

324

325

326

327

328

329

330

331

332

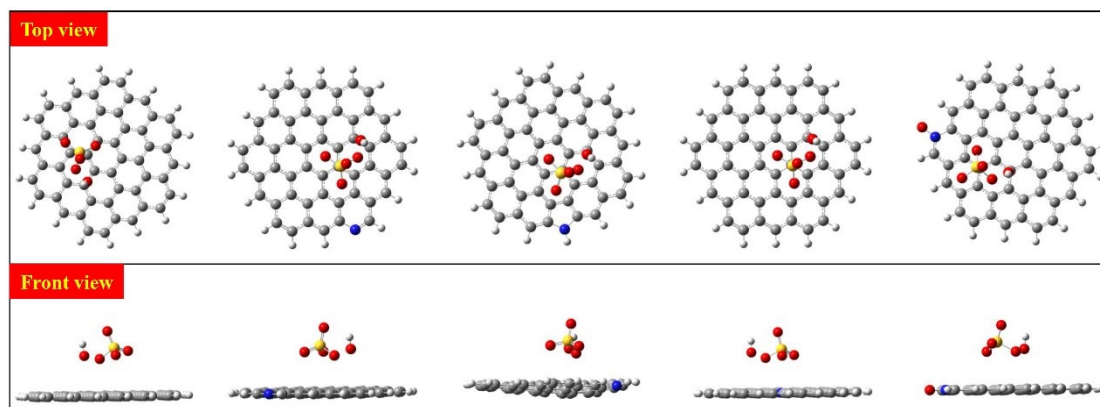

333 PG-PMS PDNG-PMS PYNG-PMS GTNG-PMS PDNOG-PMS  
 334 **Fig. S13.** Optimized binding configurations of PMS with pristine graphene (PG), pyridinic N-  
 335 doped graphene (PDNG), pyrrolic N-doped graphene (PYNG), graphitic N-doped graphene  
 336 (GTNG) and pyridine N-oxide-doped graphene (PDNOG), as shown in both top and front  
 337 views.

338

339

340

341

342

343

344

345

346

347

348

349

350

351

352

353

354

355

356

357

358

359

360

361



362

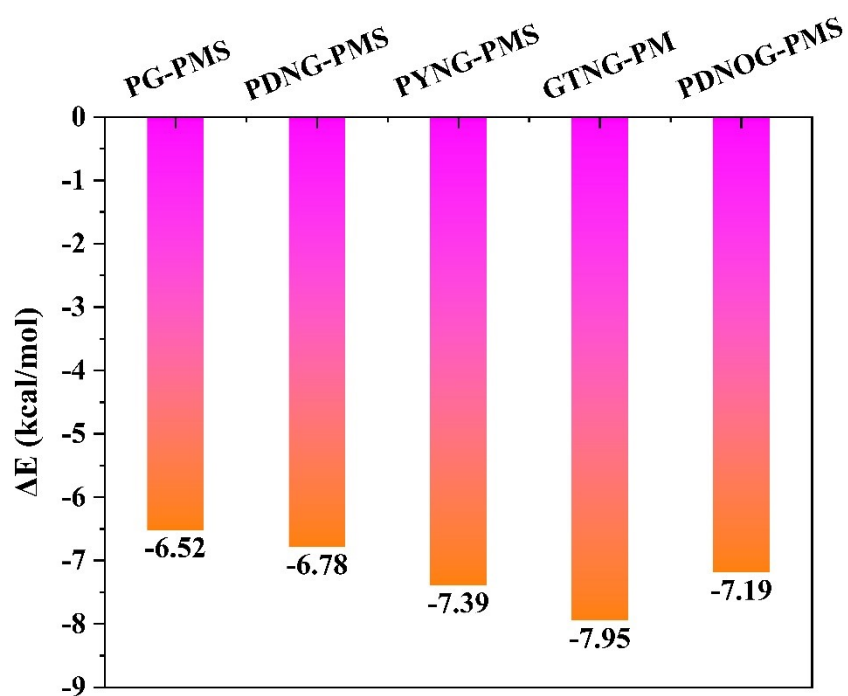

363

364 **Fig. S14.** Adsorption energies ( $\Delta E$ s) of PMS to pristine graphene (PG), pyridinic N-doped  
365 graphene (PDNG), pyrrolic N-doped graphene (PYNG), graphitic N-doped graphene (GTNG)  
366 and pyridine N-oxide-doped graphene (PDNOG, g).

367

368

369

370

371

372

373

374

375

376

377

378

379

380

381

382

383

384

385

386

387

388

389

390

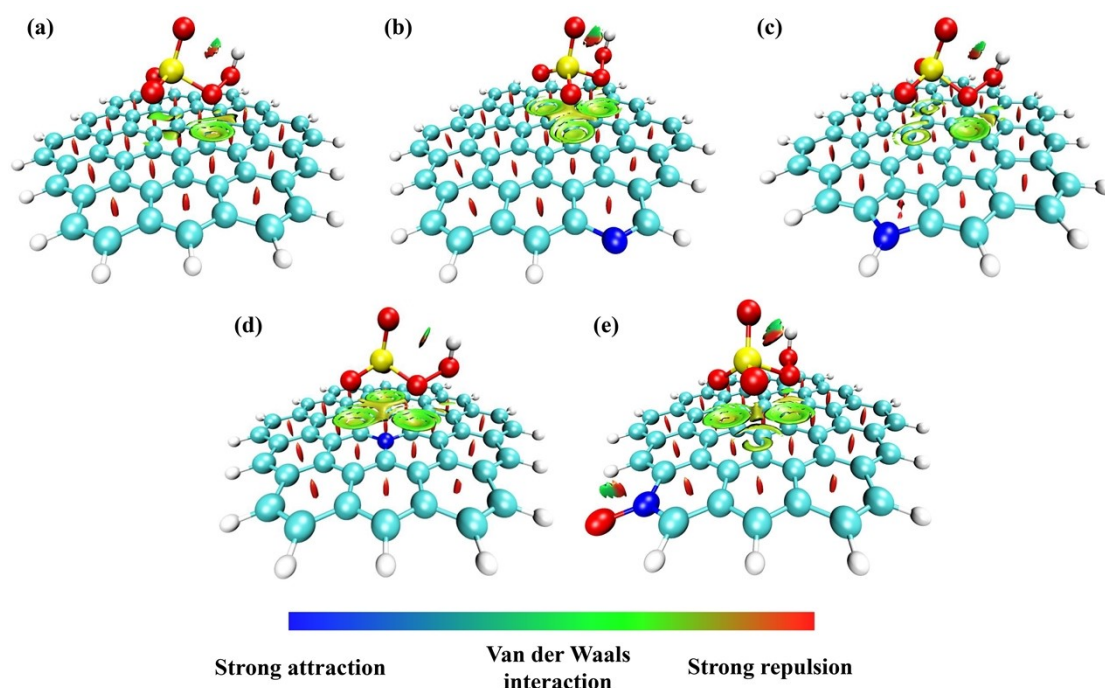

391

392 **Fig. S15.** Reduced density gradient (RDG) isosurfaces ( $s = 0.5$  a.u.) by the values of  $\text{sign}(\lambda_2)\rho$   
393 for PG-PMS (a), PDNG-PMS (b), PYNG-PMS (c), GTNG-PMS (d) and PDNOG-PMS (e)  
394 systems.

395

396 To clarify the specific interaction between PMS and various N-doped graphene  
397 fragments, reduced density gradient (RDG) function analysis was further carried out  
398 (Fig. S15). For both nitrogen-free and nitrogen-doped graphene sheets, a distinct green  
399 region is observed at their interface with PMS molecule, demonstrating the presence of  
400 van der Waals forces<sup>3,4</sup>.

401

402

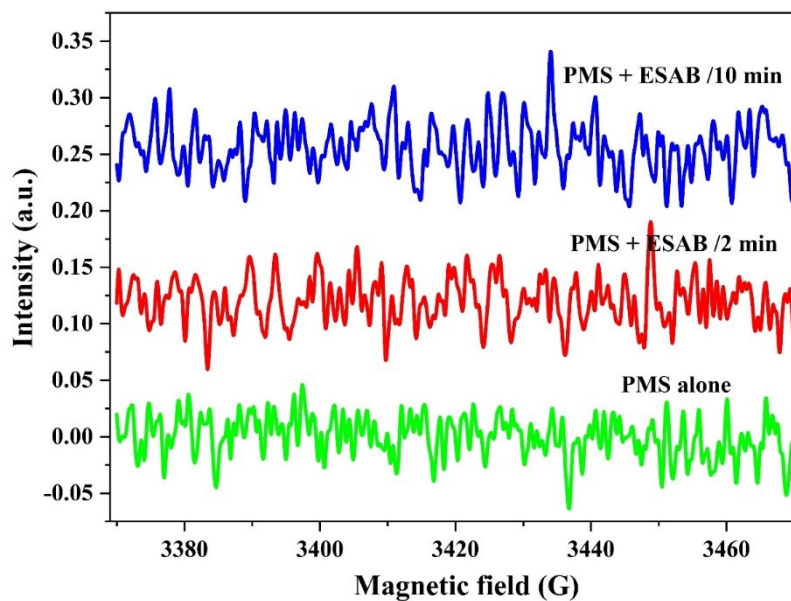

403

404 **Fig. S16.** EPR spectra in PMS/ESAB-800 system using DMPO for capturing  $\text{SO}_4^{\cdot-}$  and  $\cdot\text{OH}$ .

405

406

407

408

409

410

411

412

413

414

415

416

417

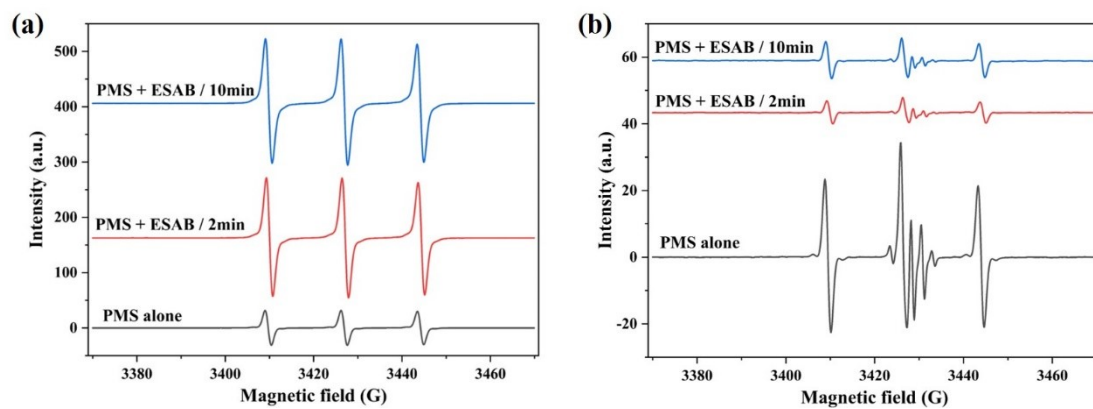

418

419

**Fig. S17.** EPR spectra for TEMP-<sup>1</sup>O<sub>2</sub>: without (a) and with (b) adding *p*-BQ (b).

420

421

422

423

424

425

426

427

428

429

430

431

432

433

434

435

436

437

438

439

440

441

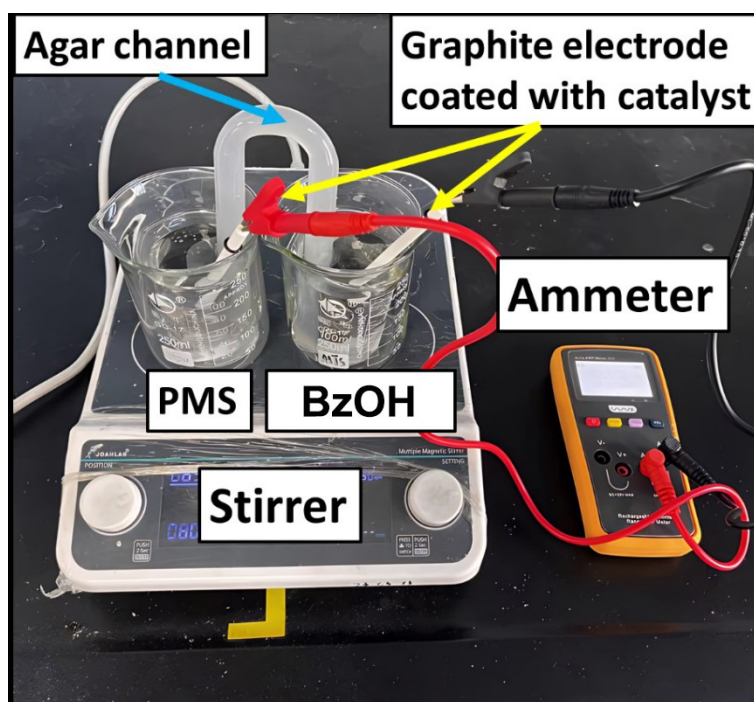

442  
443  
444  
445  
446  
447  
448  
449  
450  
451  
452  
453  
454  
455  
456  
457  
458  
459  
460

**Fig. S18.** Digital image of galvanic oxidation system (GOS).

461 **Table S1** UPLC analysis methods for BzOH and BzH.

| Samples | Mobile phase                | Wavelength (nm) | Flow rate (mL<br>min <sup>-1</sup> ) | Column<br>temperature (°C) |
|---------|-----------------------------|-----------------|--------------------------------------|----------------------------|
| BzOH    | MeOH/H <sub>2</sub> O = 7/3 | 215             | 0.8                                  | 25                         |
| BzH     | MeOH/H <sub>2</sub> O = 9/1 | 250             | 0.8                                  | 25                         |

462

463

464

465 **Table S2** The atomic percent of C, N and O in *Enteromorpha*, ESAB-600, ESAB-700, ESAB-  
466 800 and ESAB-900.

| Sample              | C (at%) | N (at%) | O (at%) | C/O ratio |
|---------------------|---------|---------|---------|-----------|
| <i>Enteromorpha</i> | 64.91   | 7.56    | 29.53   | 2.20      |
| ESAB-600            | 85.01   | 6.75    | 8.98    | 9.47      |
| ESAB-700            | 86.09   | 6.29    | 9.82    | 8.77      |
| ESAB-800            | 87.11   | 6.61    | 9.47    | 9.20      |
| ESAB-900            | 88.56   | 3.72    | 8.34    | 10.62     |

467

468

469

470 **Table S3** Surface properties of the as-prepared catalysts.

| Samples  | BET surface area<br>(m <sup>2</sup> g <sup>-1</sup> ) | Total pore volume<br>(cm <sup>3</sup> g <sup>-1</sup> ) | Average pore diameter<br>(nm) |
|----------|-------------------------------------------------------|---------------------------------------------------------|-------------------------------|
| ESAB-600 | 104                                                   | 0.20                                                    | 7.926                         |
| ESAB-700 | 100                                                   | 0.19                                                    | 7.995                         |
| ESAB-800 | 171                                                   | 0.21                                                    | 7.514                         |
| ESAB-900 | 189                                                   | 0.22                                                    | 7.081                         |

471

472

473

474

475

476 **References**

- 477 1. Y. N. Shang, X. Xu, Z. H. Wang, B. Jin, R. Wang, Z. F. Ren, B. Y. Gao and Q. Y. Yue,  
478 *Acs Sustainable Chemistry & Engineering*, 2018, **6**, 6920-6931.
- 479 2. C. Chen, T. F. Ma, Y. N. Shang, B. Y. Gao, B. Jin, H. B. Dan, Q. Li, Q. Y. Yue, Y. W. Li,  
480 Y. Wang and X. Xu, *Applied Catalysis B-Environmental*, 2019, **250**, 382-395.
- 481 3. C. Li, X. S. Liu, Y. L. Han, Q. Guo, W. B. Yang, Q. Liu, B. Song, X. L. Zheng and S. Y.  
482 Tao, *Cell Reports Physical Science*, 2021, **2**.
- 483 4. H. Dan, Y. Gao, L. Feng, W. Yin, X. Xu, B. Gao and Q. Yue, *Journal of Hazardous*  
484 *Materials*, 2023, **445**, 130469.
- 485
